# Supplementary material for: Synthesis of highly electrochemically active Li2S nanoparticles for lithium–sulfur-batteries
Source: Royal Society of Chemistry journal article supplement (doi:10.1039/c5ta04504e), 2015-01-01
Supplement: c5ta04504e1.pdf [file c5ta04504e1.pdf]

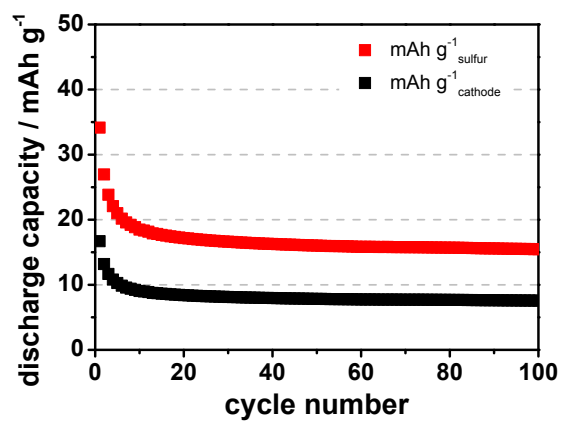

**Figure S1** Discharge capacity of cathodes from pristine  $\text{Li}_2\text{SO}_4 \cdot \text{H}_2\text{O}$  reduced at 900 °C.

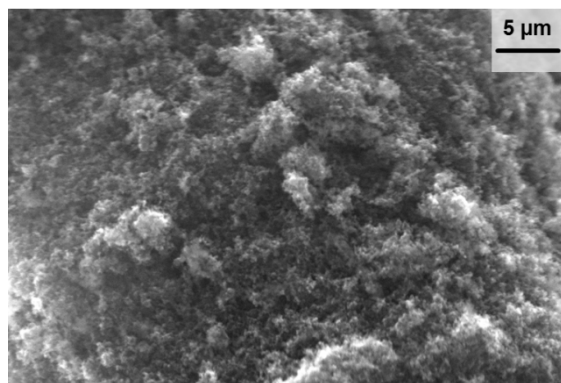

**Figure S2** SEM image of 84 h ball milled  $\text{Li}_2\text{SO}_4 \cdot \text{H}_2\text{O}$
